# Supplementary material for: Control of the morphology, specific surface area and agglomeration of precipitated calcium carbonate crystals through a multiphase carbonation process
Source: Royal Society of Chemistry journal article supplement (doi:10.1039/c9ce01876j), 2020-01-01
Supplement: c9ce01876j1.pdf [file c9ce01876j1.pdf]

# CrystEngComm

## Supporting Information for

### Control of morphology, specific surface area and agglomeration of precipitated calcium carbonate crystals through a multiphase carbonation process

Meisam Ghiasi, Mahmoud Abdollahy<sup>\*</sup>, Mohammad Reza Khalesi, Ehsan Ghiasi  
Department of Mining Engineering, Tarbiat Modares University, Tehran, Iran

Supporting information S1:

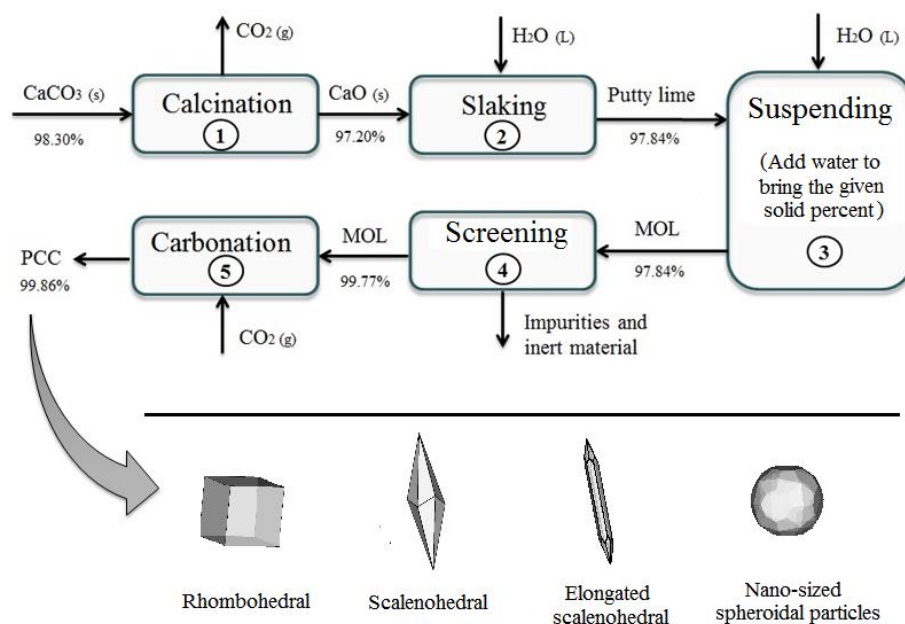

**Figure S1.** Schematic of PCC production from limestone (The purity of the produced materials is shown in each step)

<sup>\*</sup> Corresponding author. Tel.: +98 9122 4995 88; fax: +98 21 82 88 43 24  
E-mail address: MINMABD@modares.ac.ir (M. Abdollahy).

Supporting information S2:

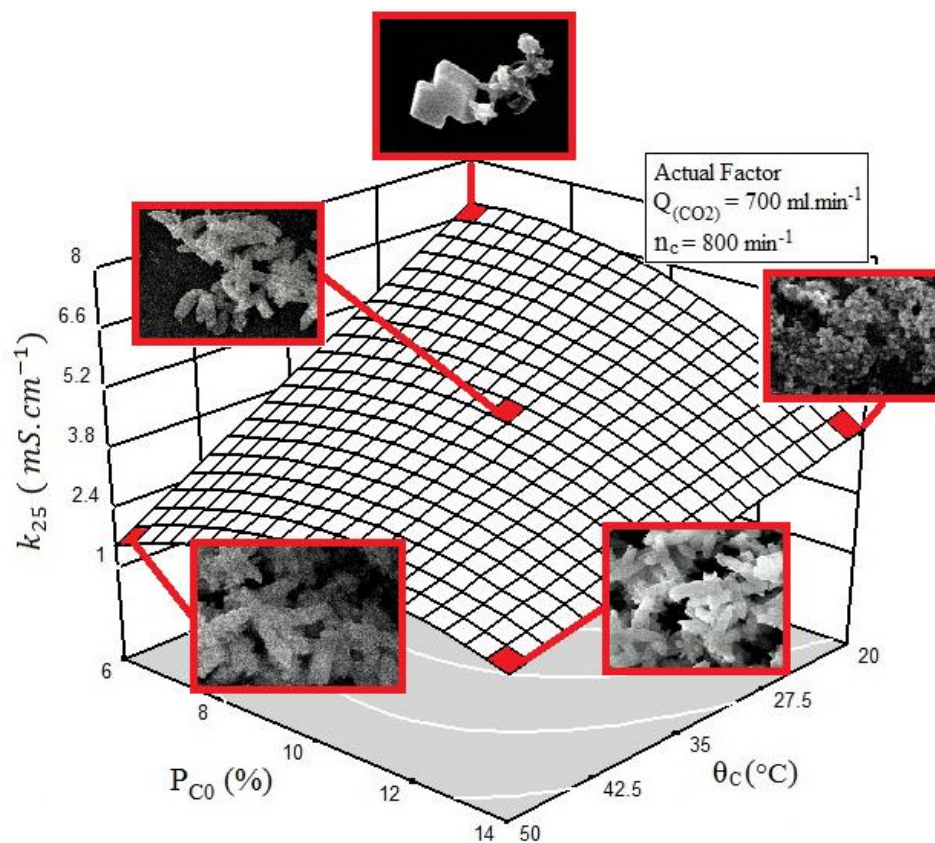

**Figure S2.** conductivity as a function of temperature ( $\theta_c$ ) and initial solid percent of the MOL suspension ( $P_{C0}$ ) with SEM micrographs of the resulting PCC crystals.

Supporting information S3:

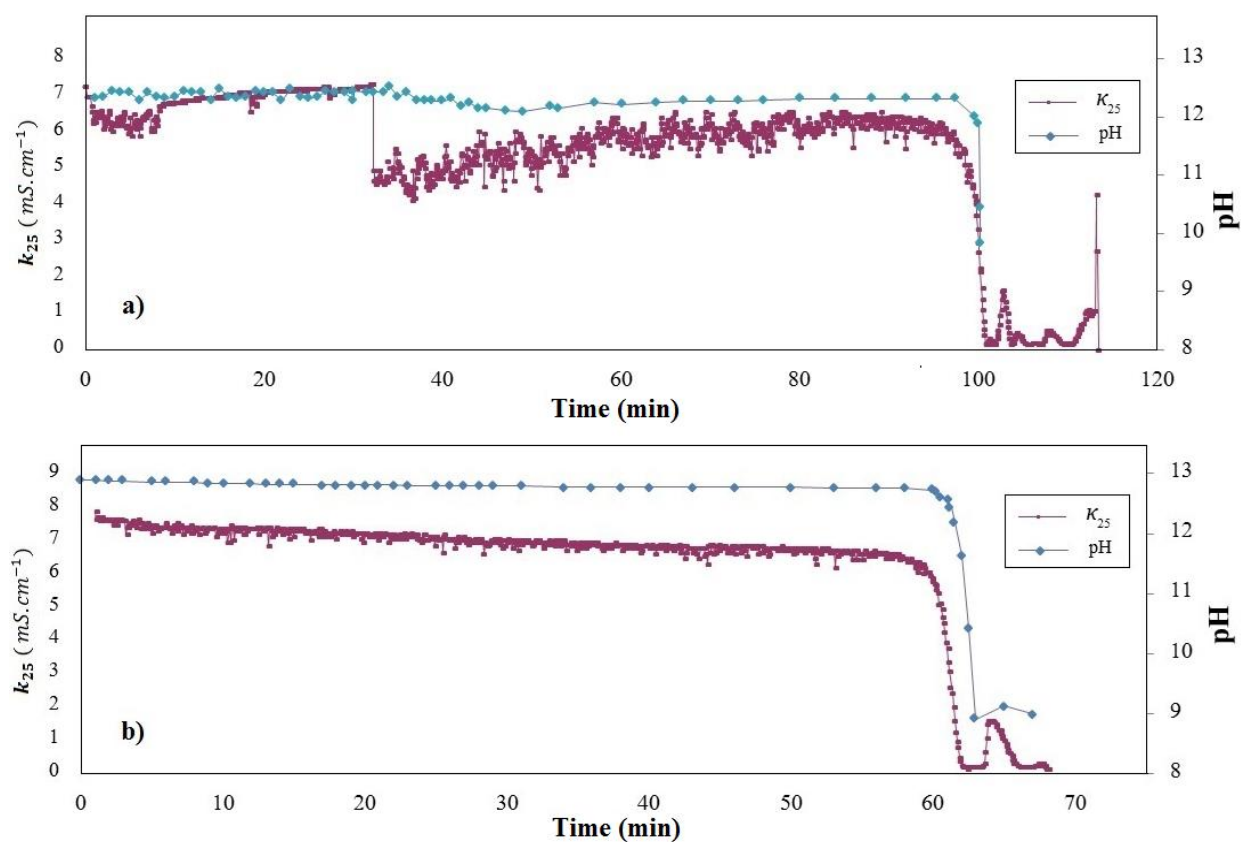

**Figure S3.** pH and conductivity variations during PCC synthesis at 20°C. a) Conductivity drastically changed during reaction time. b) Steady state conductivity production and supersaturation mode by eliminating all shocks to the precipitation system.

Supporting information S4:

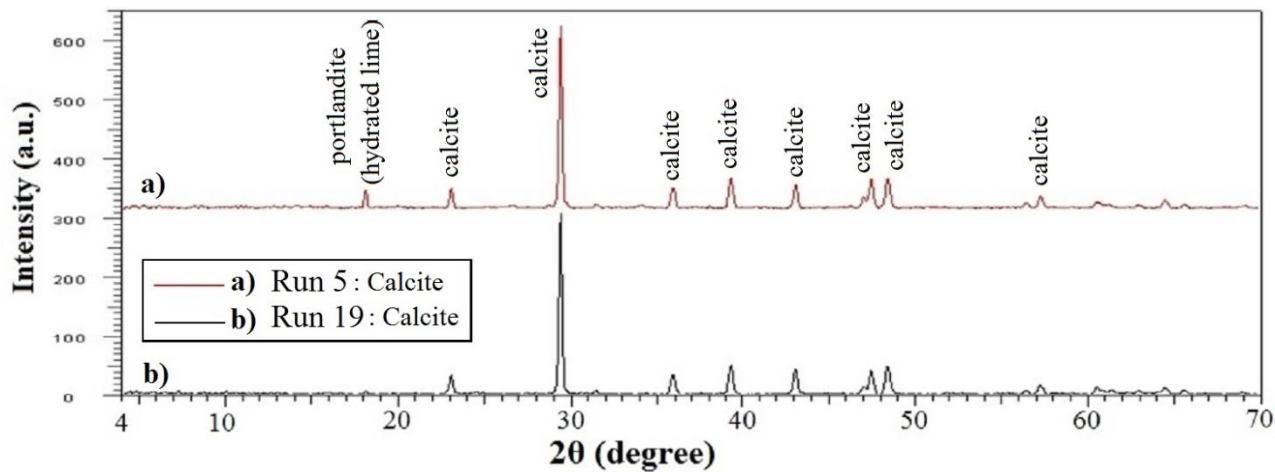

**Figure S4.** XRD Diffraction patterns of the crystal structure of the precipitated calcium carbonates. The X-ray diffraction patterns were done on a diffractometer (Bruker AXS, D8-Advance model) operated at 40 kV accelerating voltage and 30 A current, using Cu  $K_{\alpha}$  radiation wavelength of 1.5418 Å. The measurements were made at room temperature at a range of 4 to 70° on 2θ with a step size of 0.02°.

Supporting information S5:

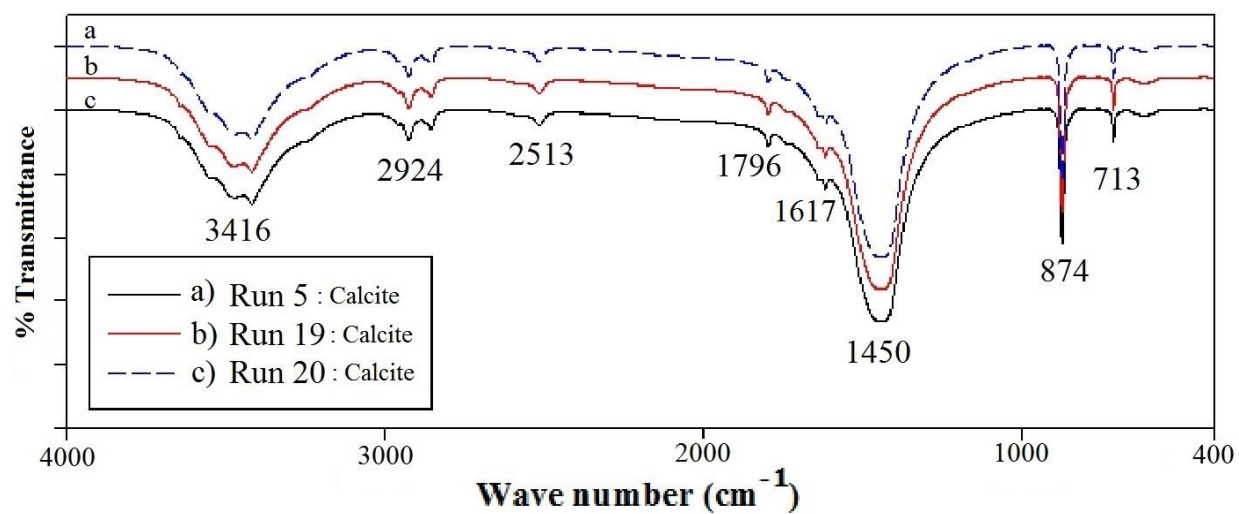

**Figure S5.** FTIR spectra of CaCO<sub>3</sub> particles. The sharp absorption bands at 713 (ν<sub>4</sub>) and 874 cm<sup>-1</sup> (ν<sub>2</sub>) suggest the presence of a calcite phase.

Supporting information S6:

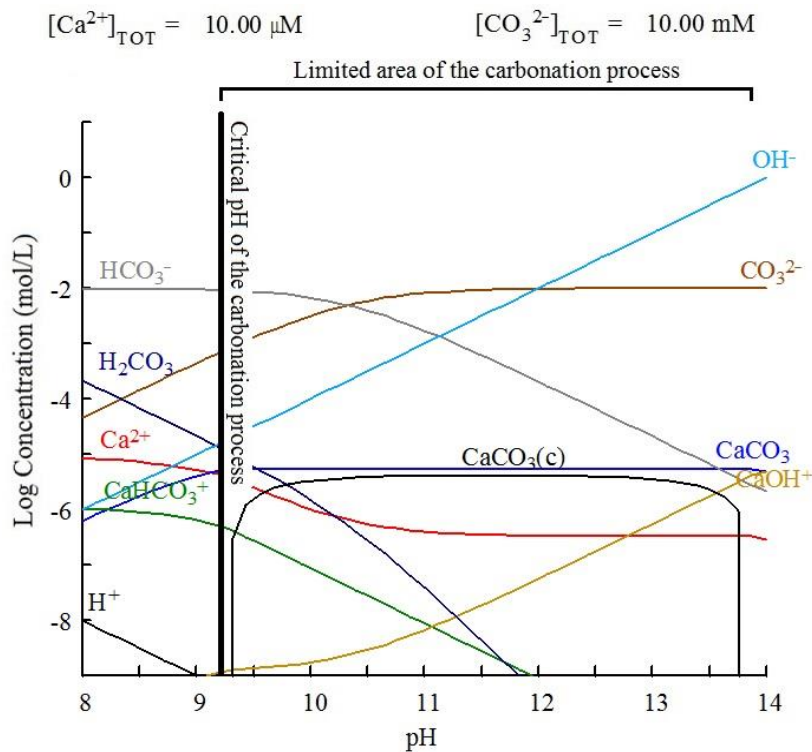

**Figure S6.** The distribution logarithmic diagram as a function of pH for limited area of the carbonation process. (c) for crystalline solids.

Supporting information S7:

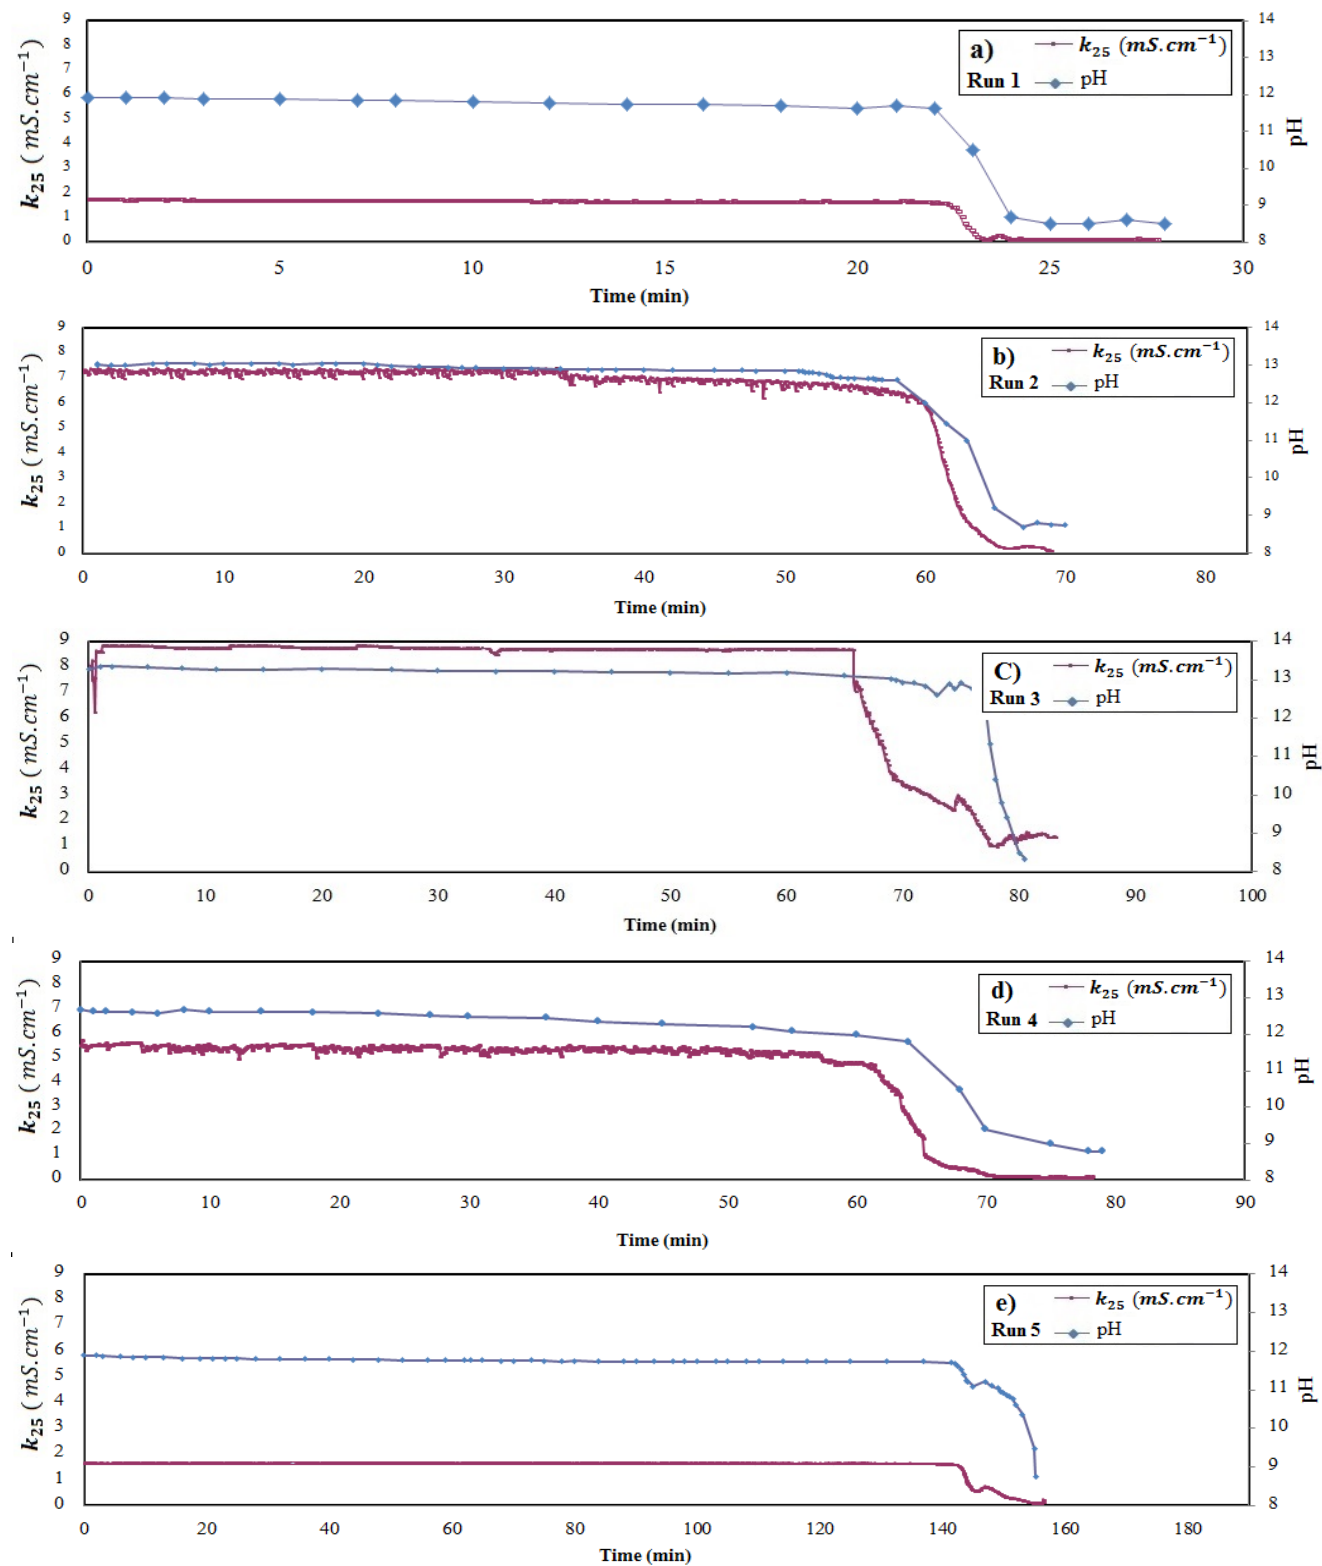

**Figure S7.** Conductivity and pH variations during the carbonation tests along. a) Run 1, b) Run 2, c) Run 3, d) Run 4, e) Run 5.

Supporting information S8:

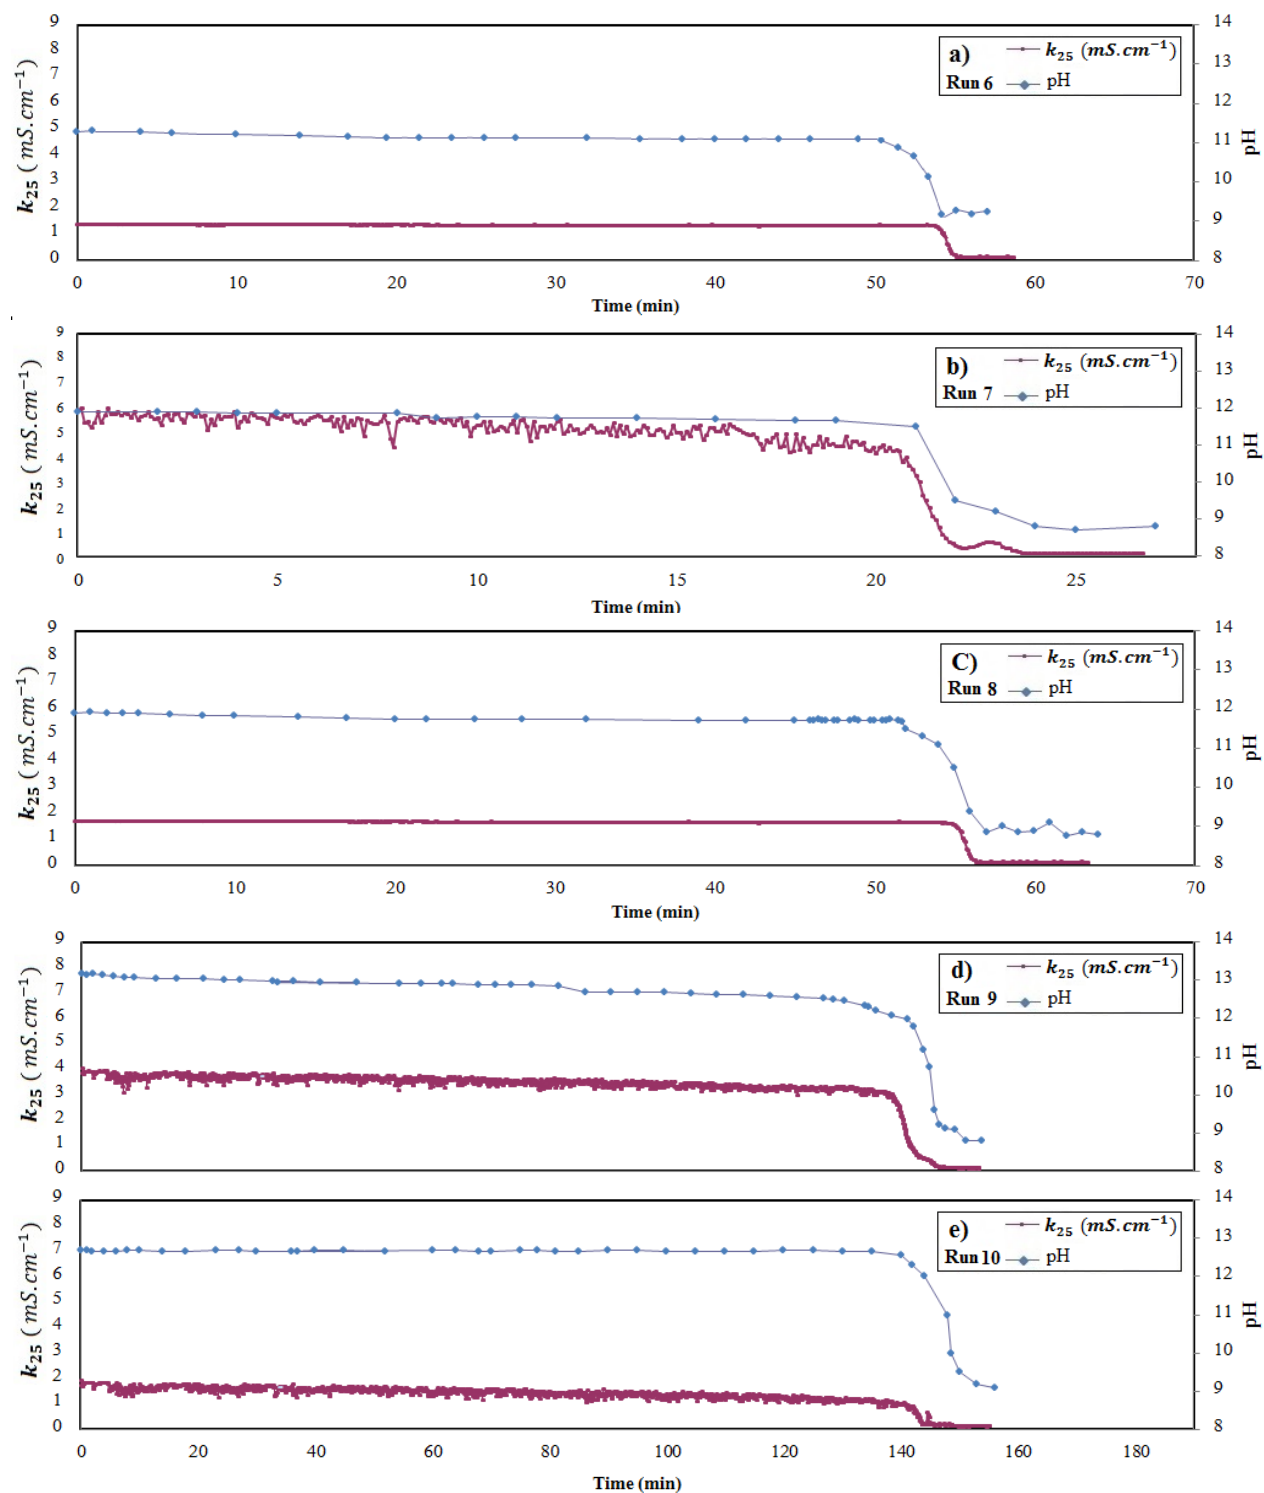

**Figure S8.** Conductivity and pH variations during the carbonation tests along. a) Run 6, b) Run 7, c) Run 8, d) Run 9, e) Run 10.



Supporting information S9:

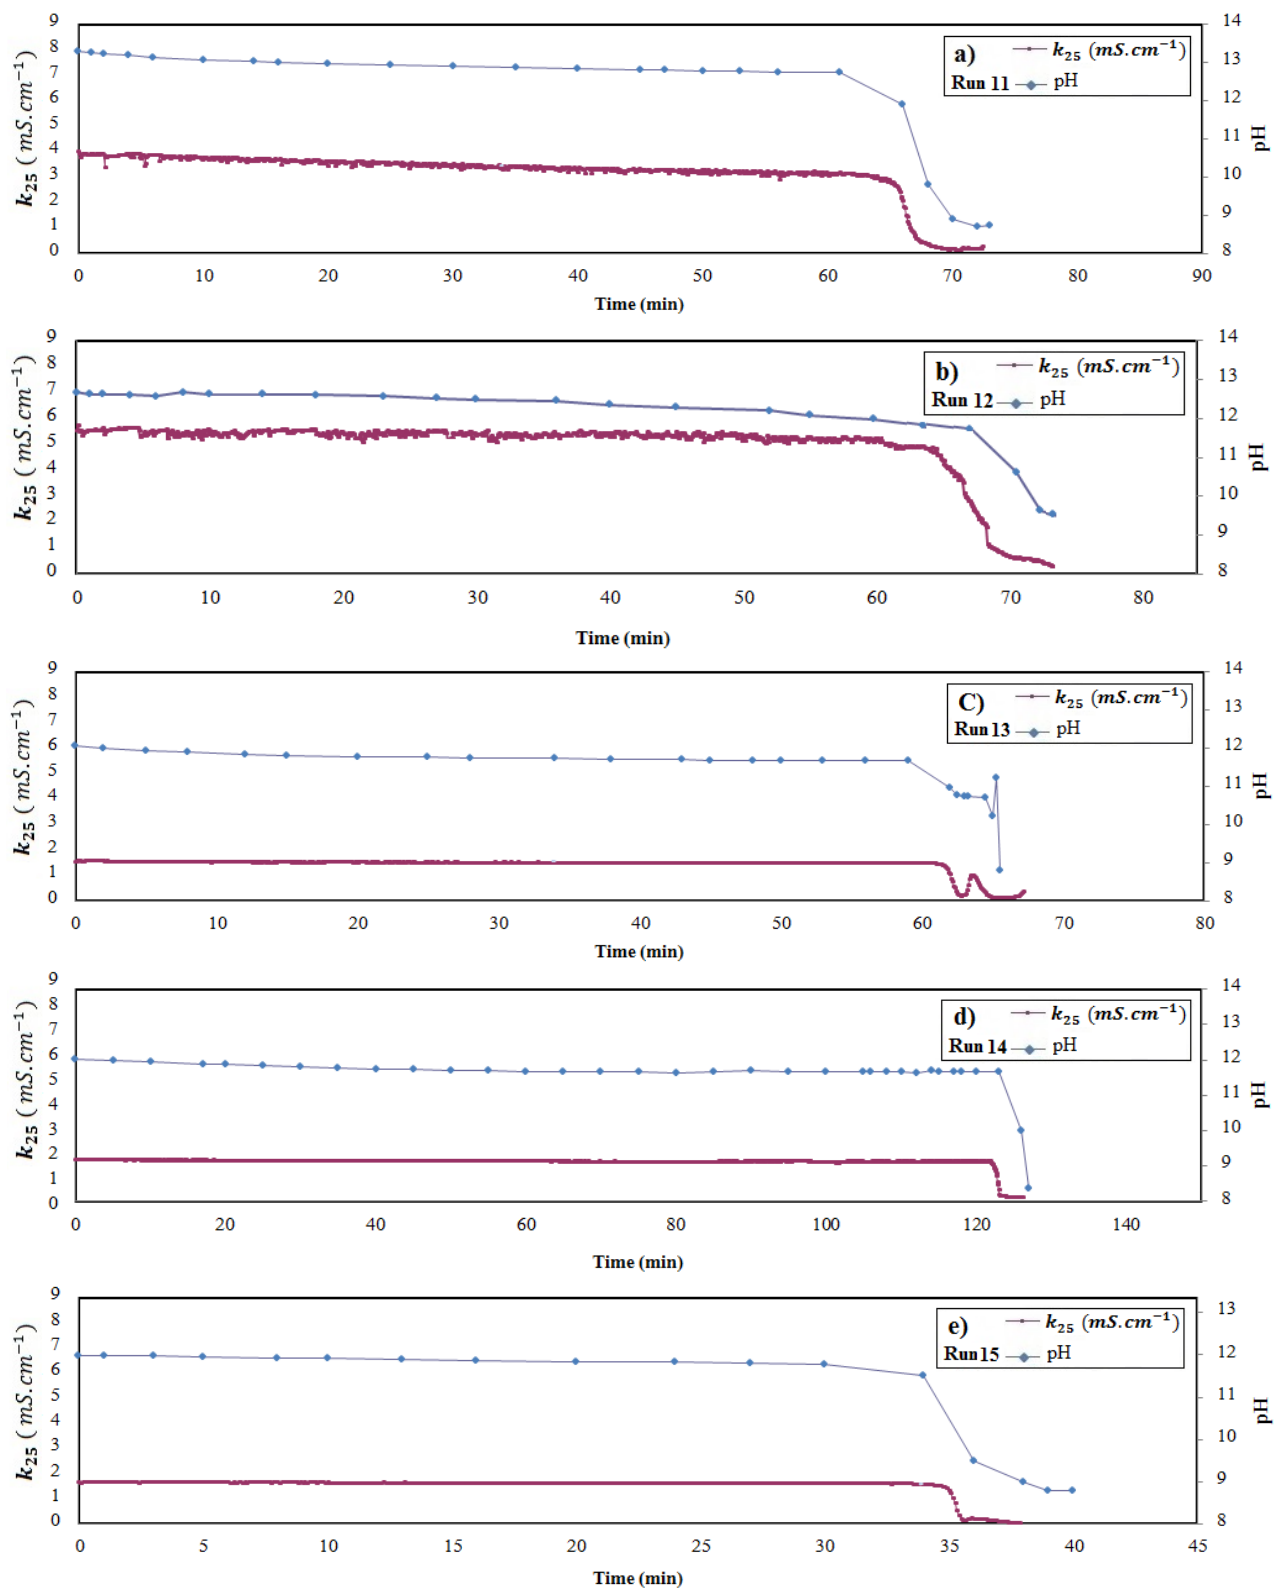

**Figure S9.** Conductivity and pH variations during the carbonation tests along. a) Run 11, b) Run 12, c) Run 13, d) Run 14, e) Run 15.

Supporting information S10:

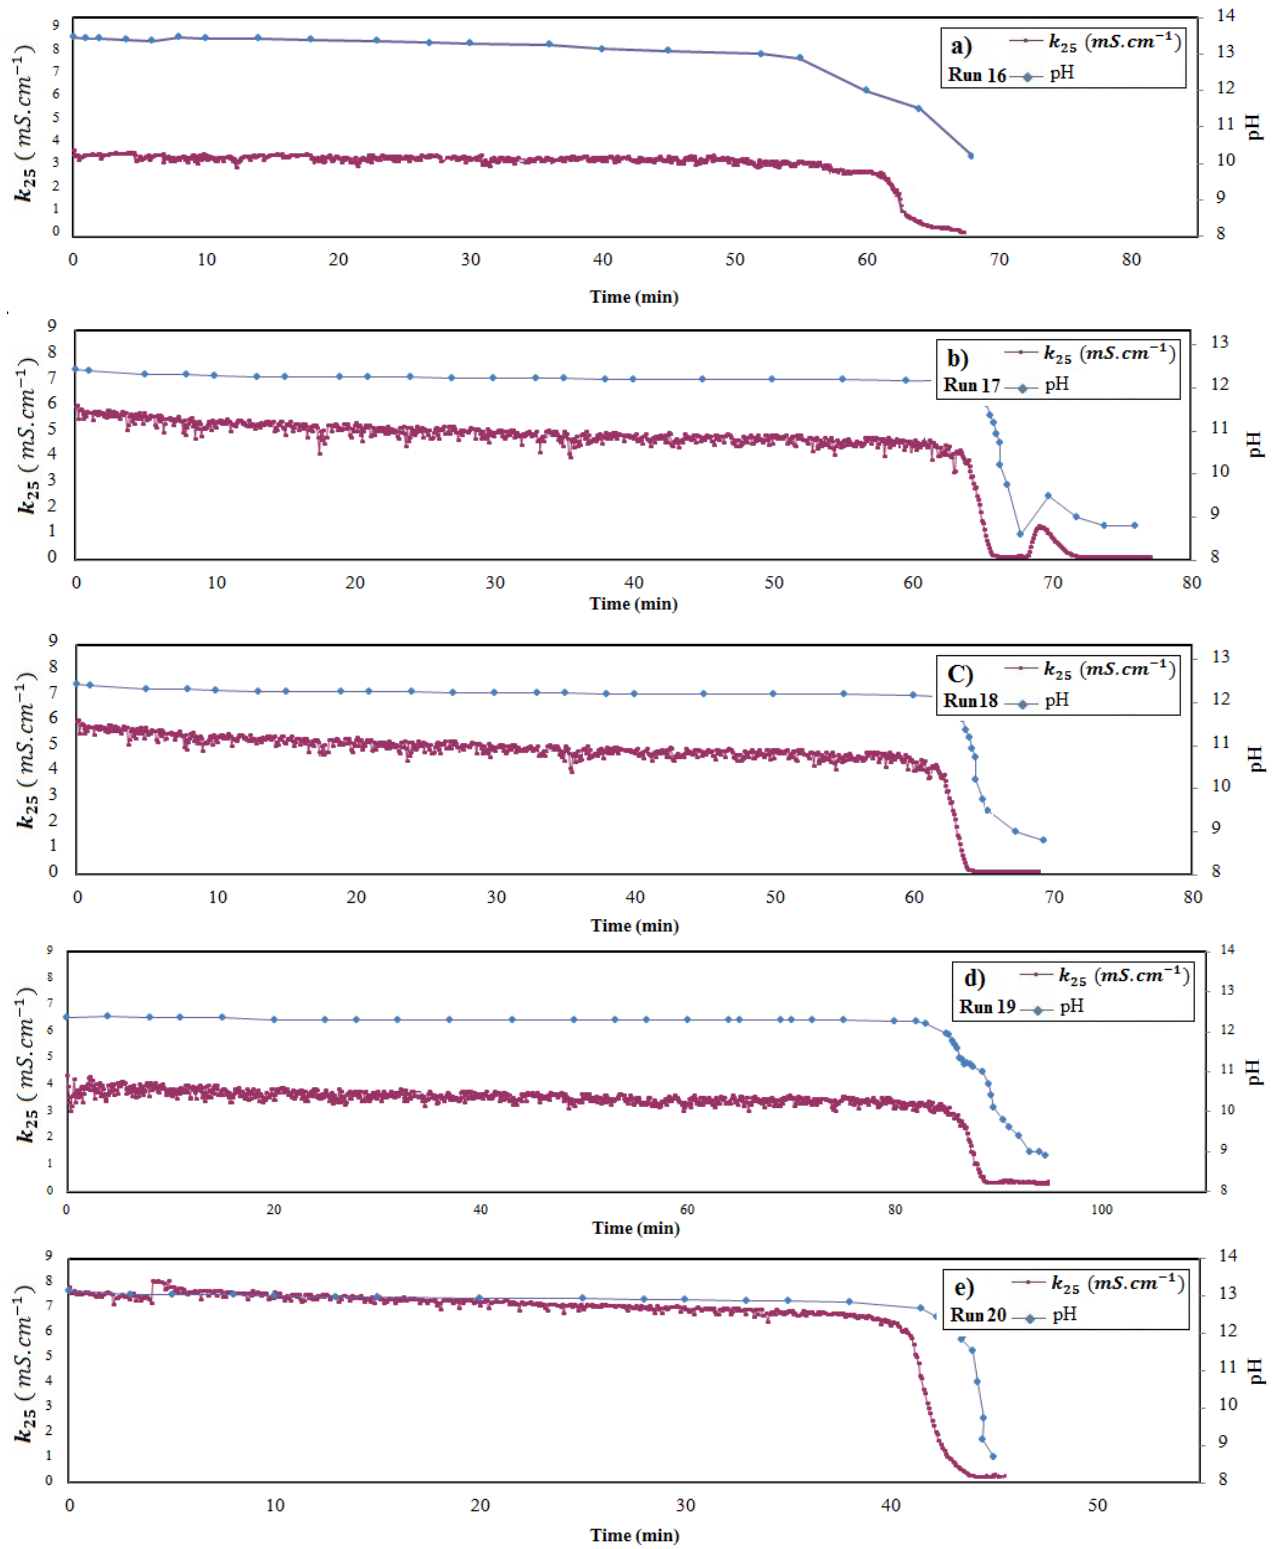

**Figure S10.** Conductivity and pH variations during the carbonation tests along. **a)** Run 16, **b)** Run 17, **c)** Run 18, **d)** Run 19, **e)** Run 20.

Supporting information S11:

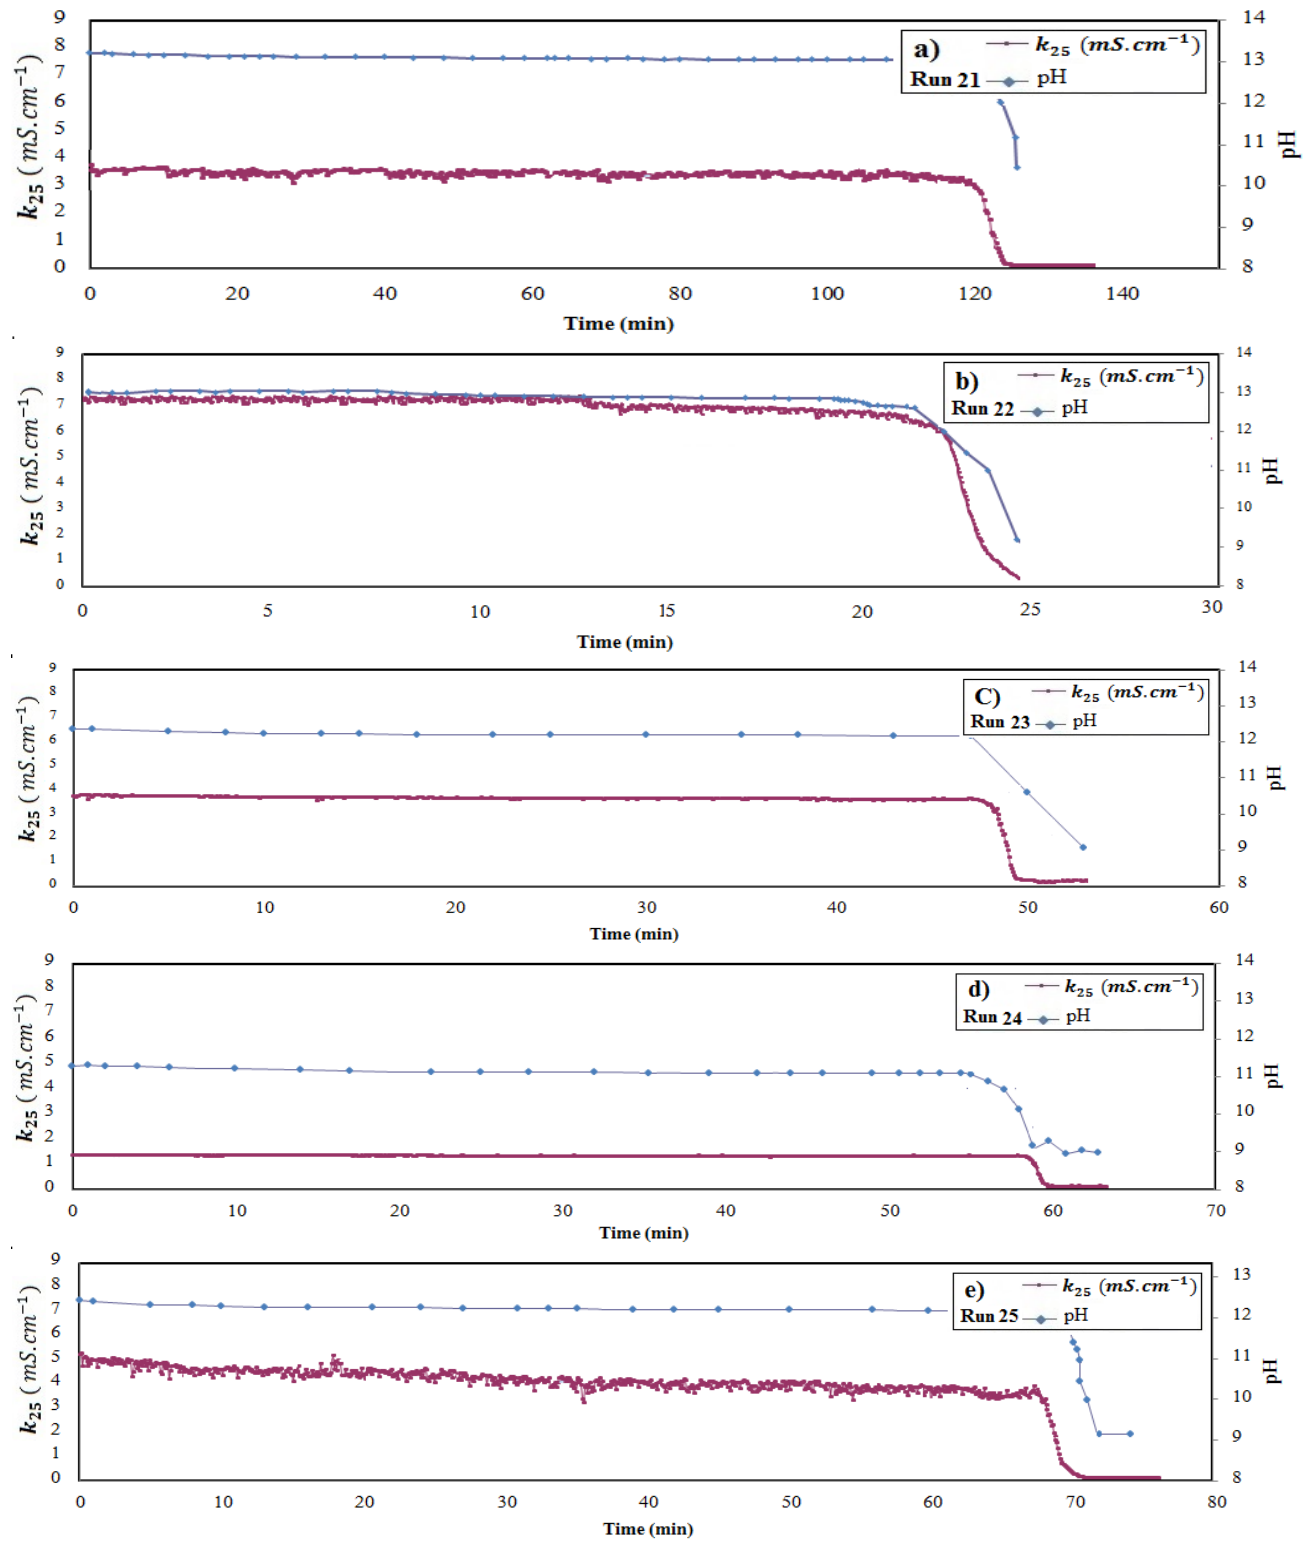

**Figure S11.** Conductivity and pH variations during the carbonation tests along. a) Run 21, b) Run 22, c) Run 23, d) Run 24, e) Run 25.

Supporting information S12:

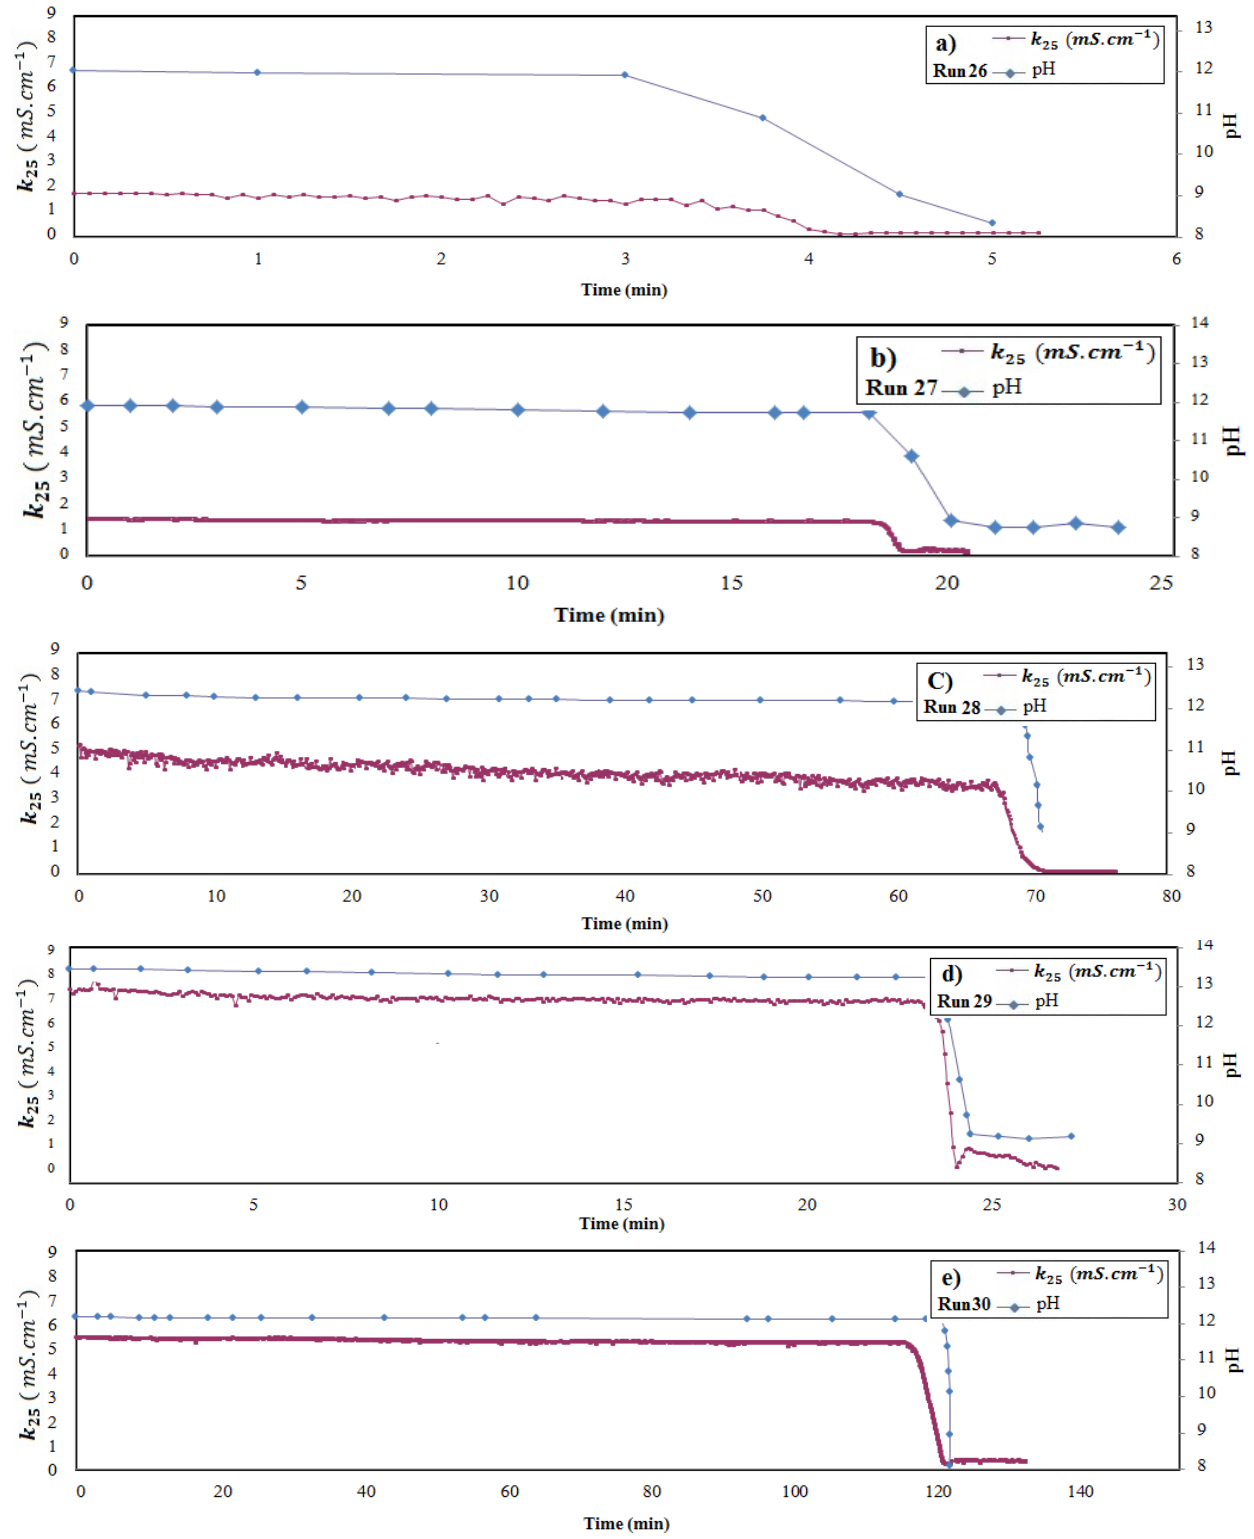

**Figure S12.** Conductivity and pH variations during the carbonation tests along. a) Run 26, b) Run 27, c) Run 28, d) Run 29, e) Run 30.

Supporting information S13:

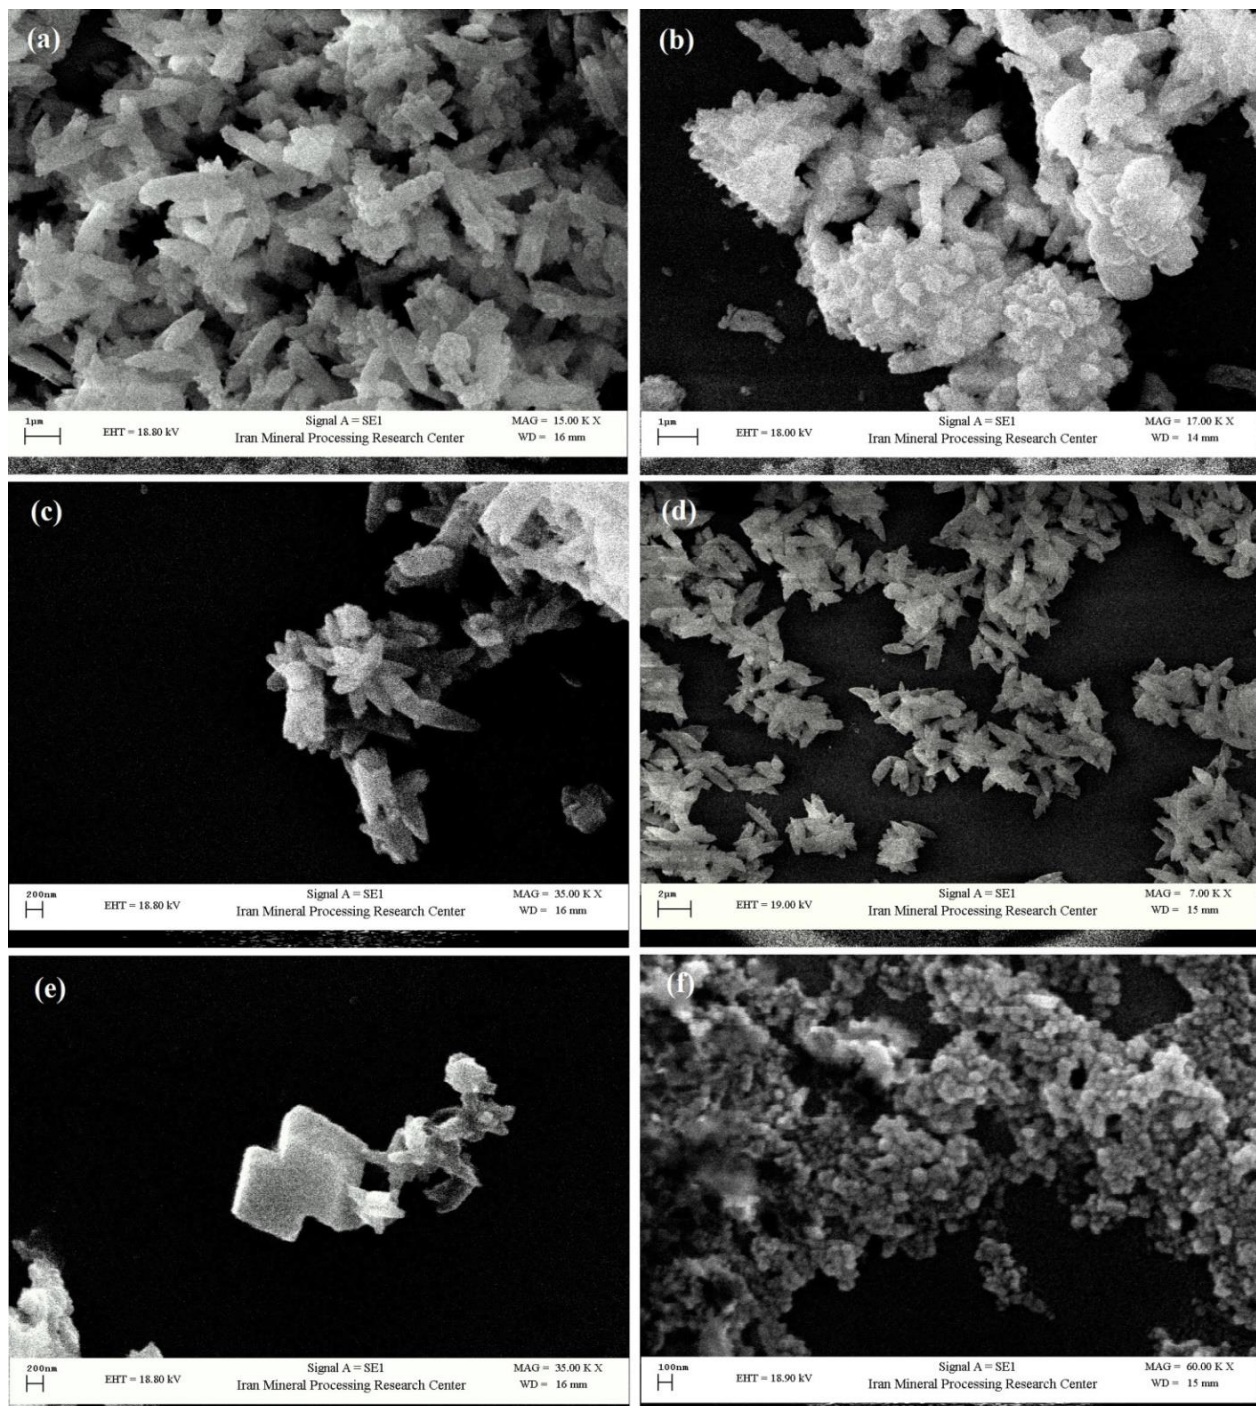

**Figure S13.** SEM micrographs of various PCC morphologies in carbonation process. The specimens were coated by sputtering with gold (coating thickness approximately 320 nm) and examined under the Qemscan<sup>TM</sup>, LEO 1450 VP scanning electron: a) elongated scalenohedral crystals, b) rosette-shape crystals growth, c) cluster scalenohedral crystals, d) scalenohedral crystals, e) rhombohedral crystals, and f) chain-like agglomerated nanoparticles

Supporting information S14:

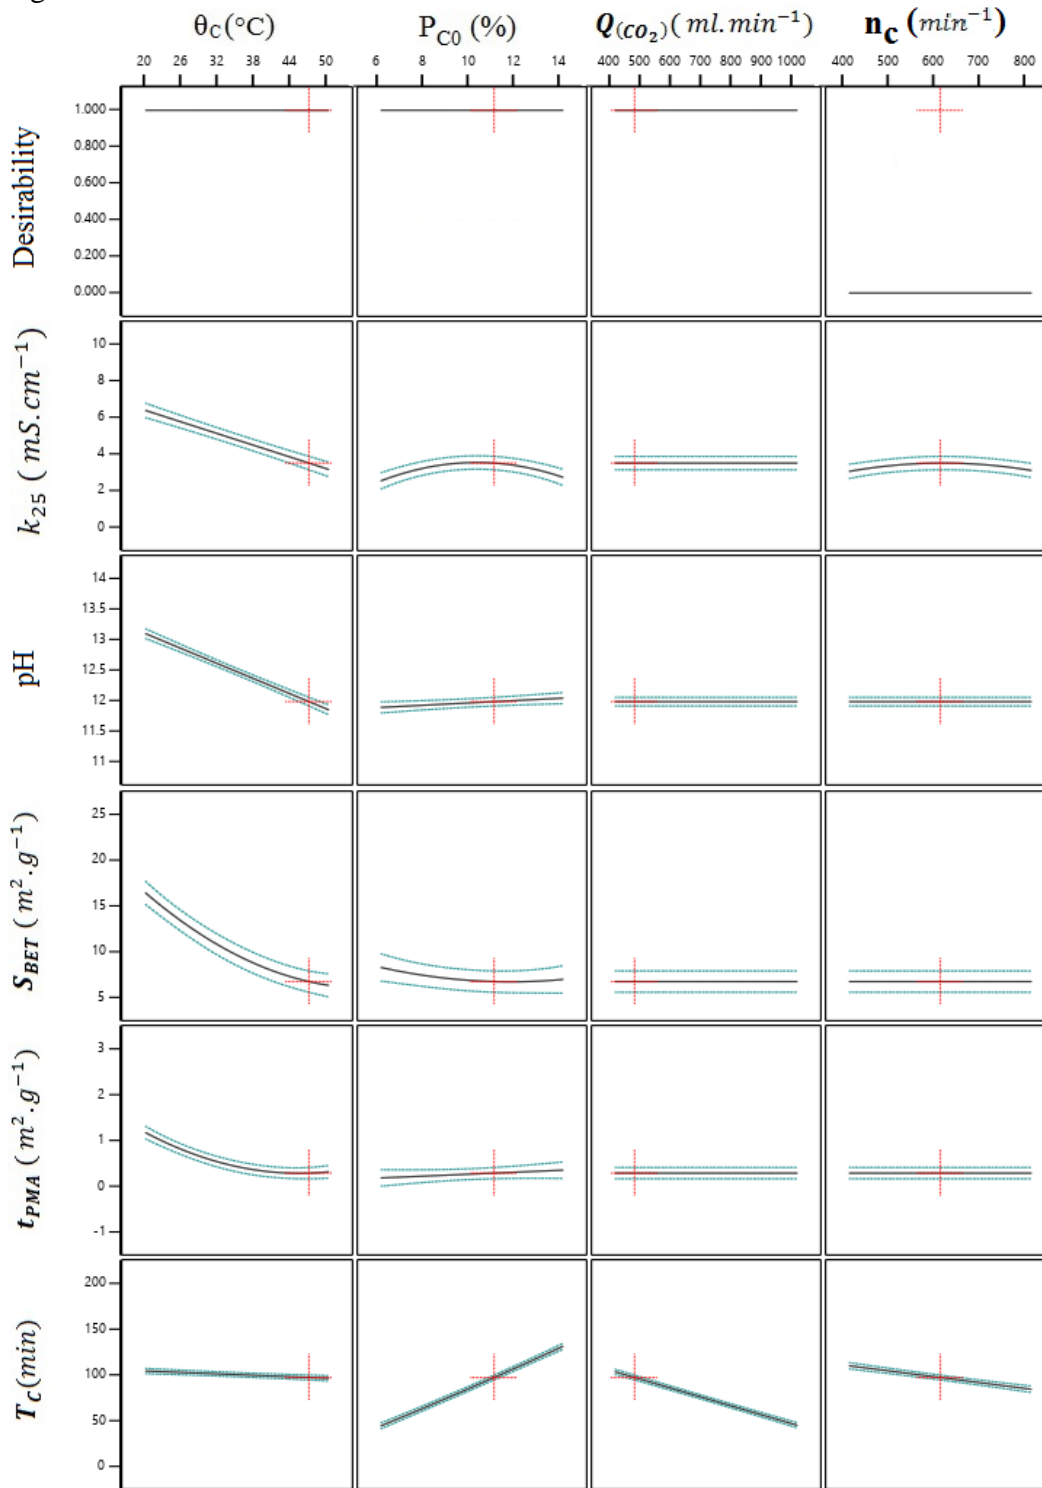

**Figure S14.** effect of temperature ( $\theta_c$ ), initial solid percent of the MOL suspension ( $P_{C0}$ ),  $\text{CO}_2$  gas flow rate ( $Q(\text{CO}_2)$ ), and agitation rate ( $n_c$ ) on the physical and chemical properties of PCC, including conductivity ( $\kappa_{25}$ ), specific surface area ( $S_{BET}$ ), microporous surface area ( $t_{PMA}$ ) and subsequently agglomeration, reaction termination time ( $T_c$ ), pH, and desirability values of parameters.

Supporting information S15:

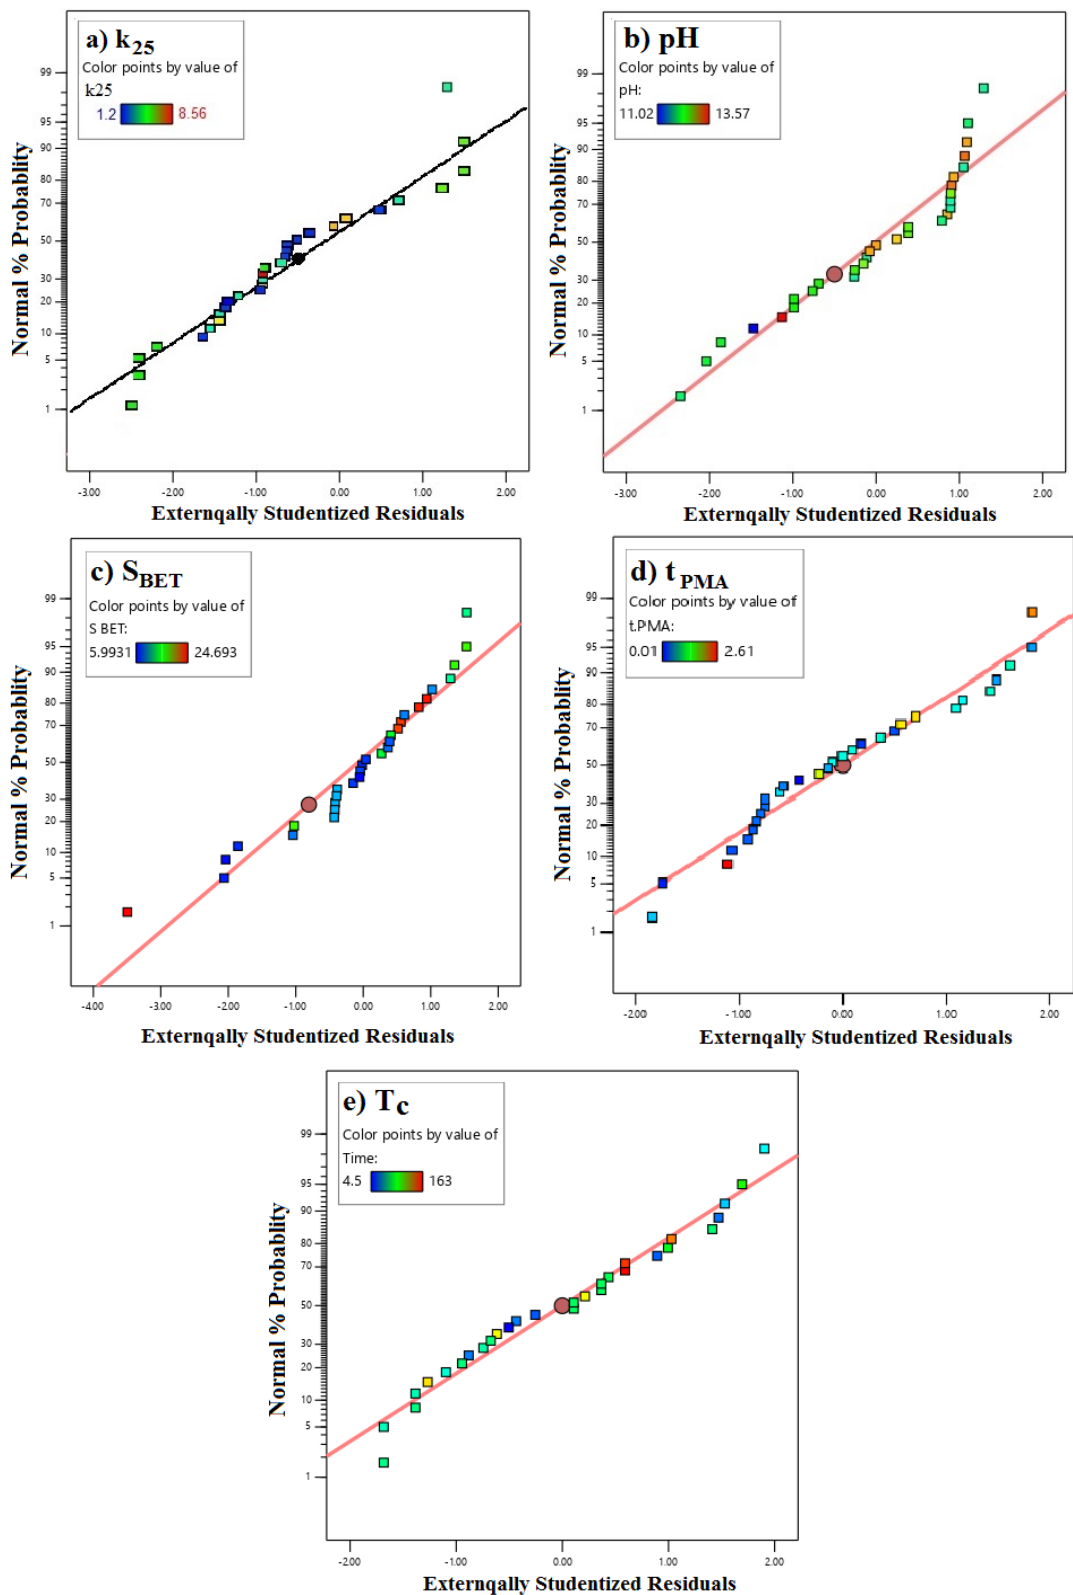

Figure S15. Normal probability plots of residual for, a)  $k_{25}$ , b) pH, c)  $S_{BET}$ , d)  $t_{PMA}$ , e)  $T_c$

Supporting information S16:

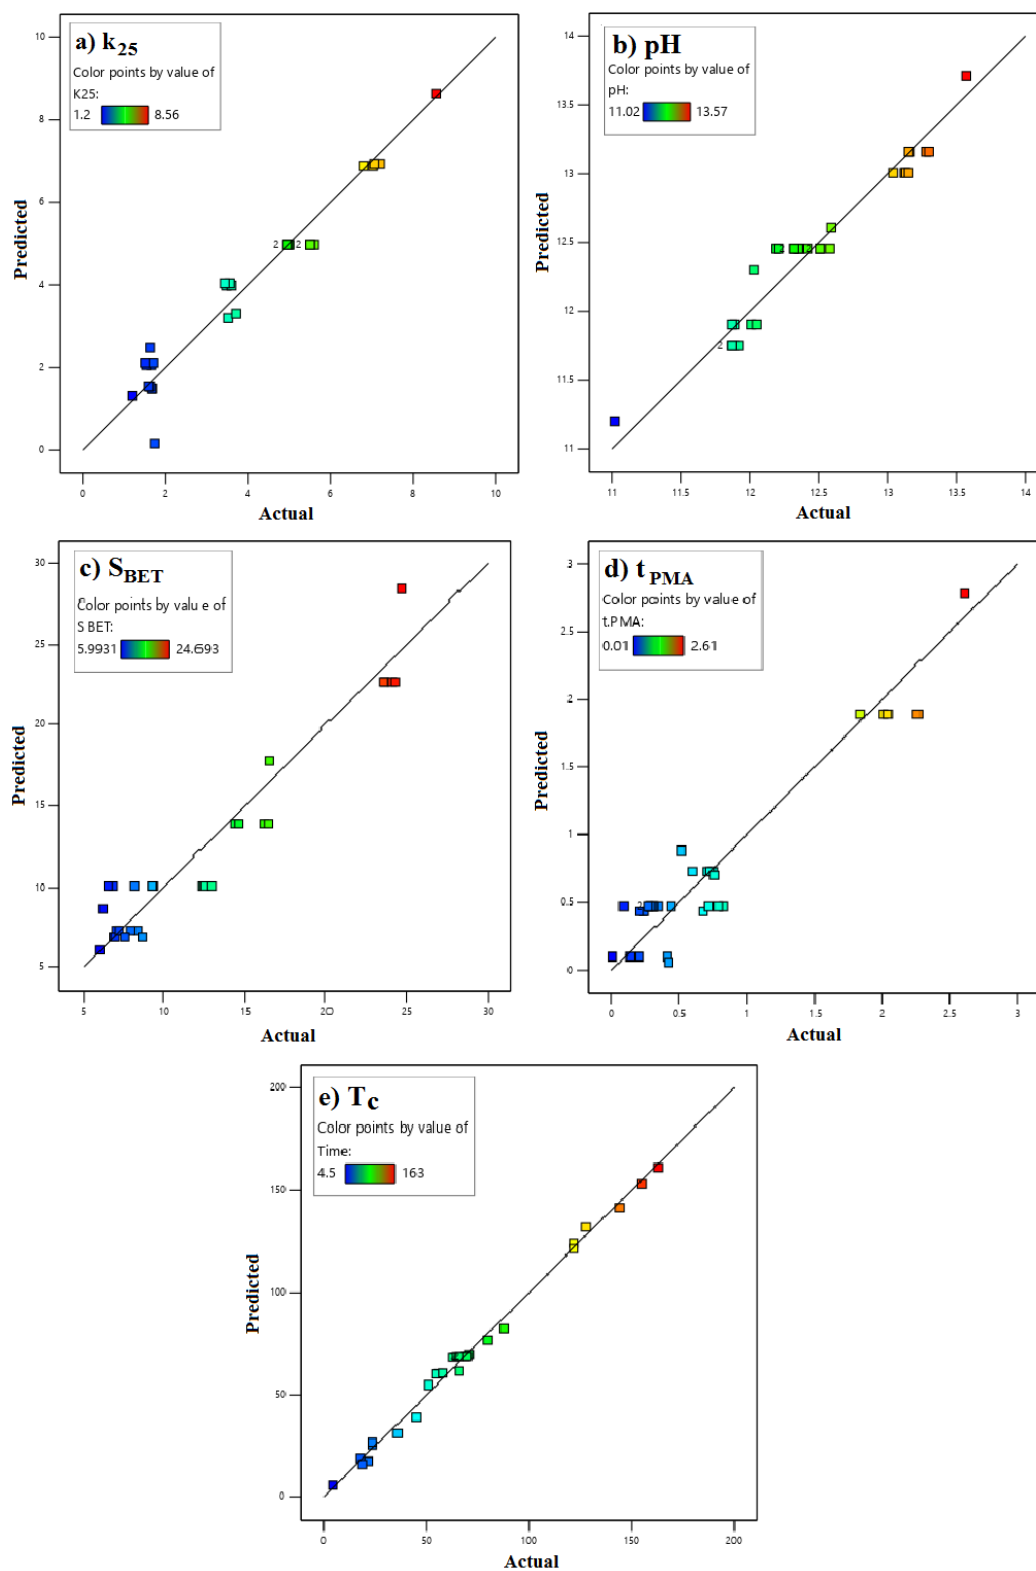

**Figure S16.** Parity plots showing the distribution of experimental versus predicted data for response variables, a)  $\kappa_{25}$ , b) pH, c)  $S_{BET}$ , d)  $t_{PMA}$ , e)  $T_c$



Supporting information S17:

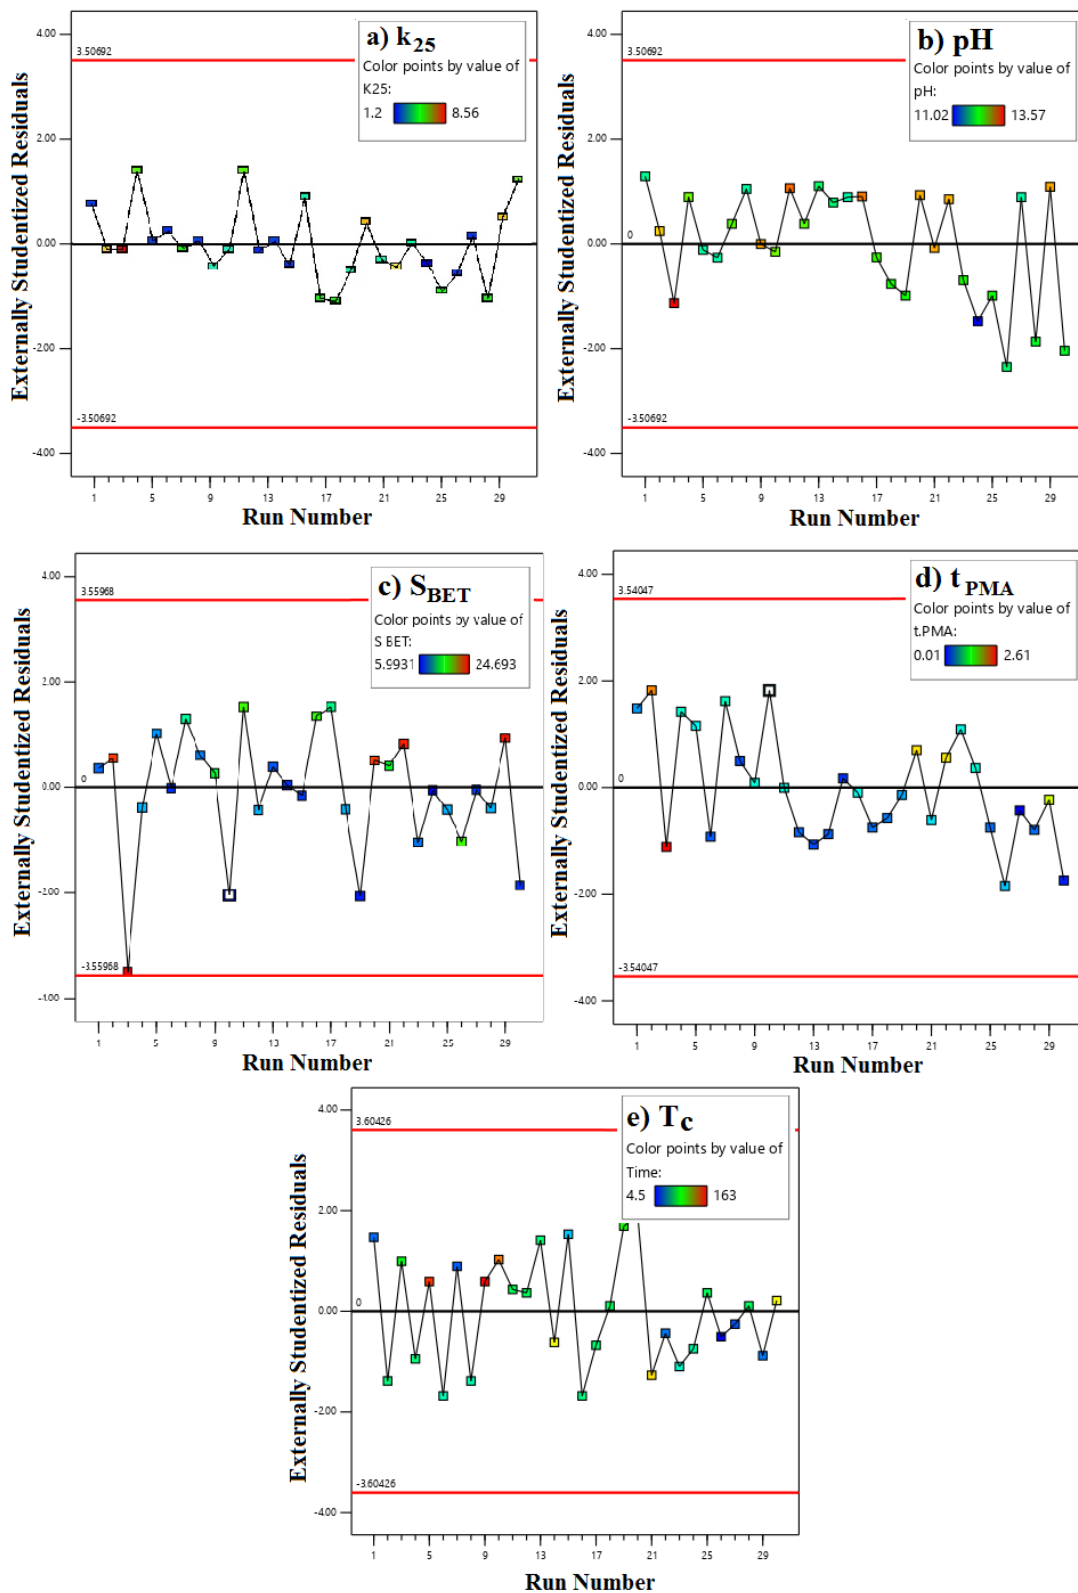

Figure S17. Plot of residuals versus fitted values for, a)  $k_{25}$ , b) pH, c)  $S_{BET}$ , d)  $t_{PMA}$ , e)  $T_c$

Supporting information S18:

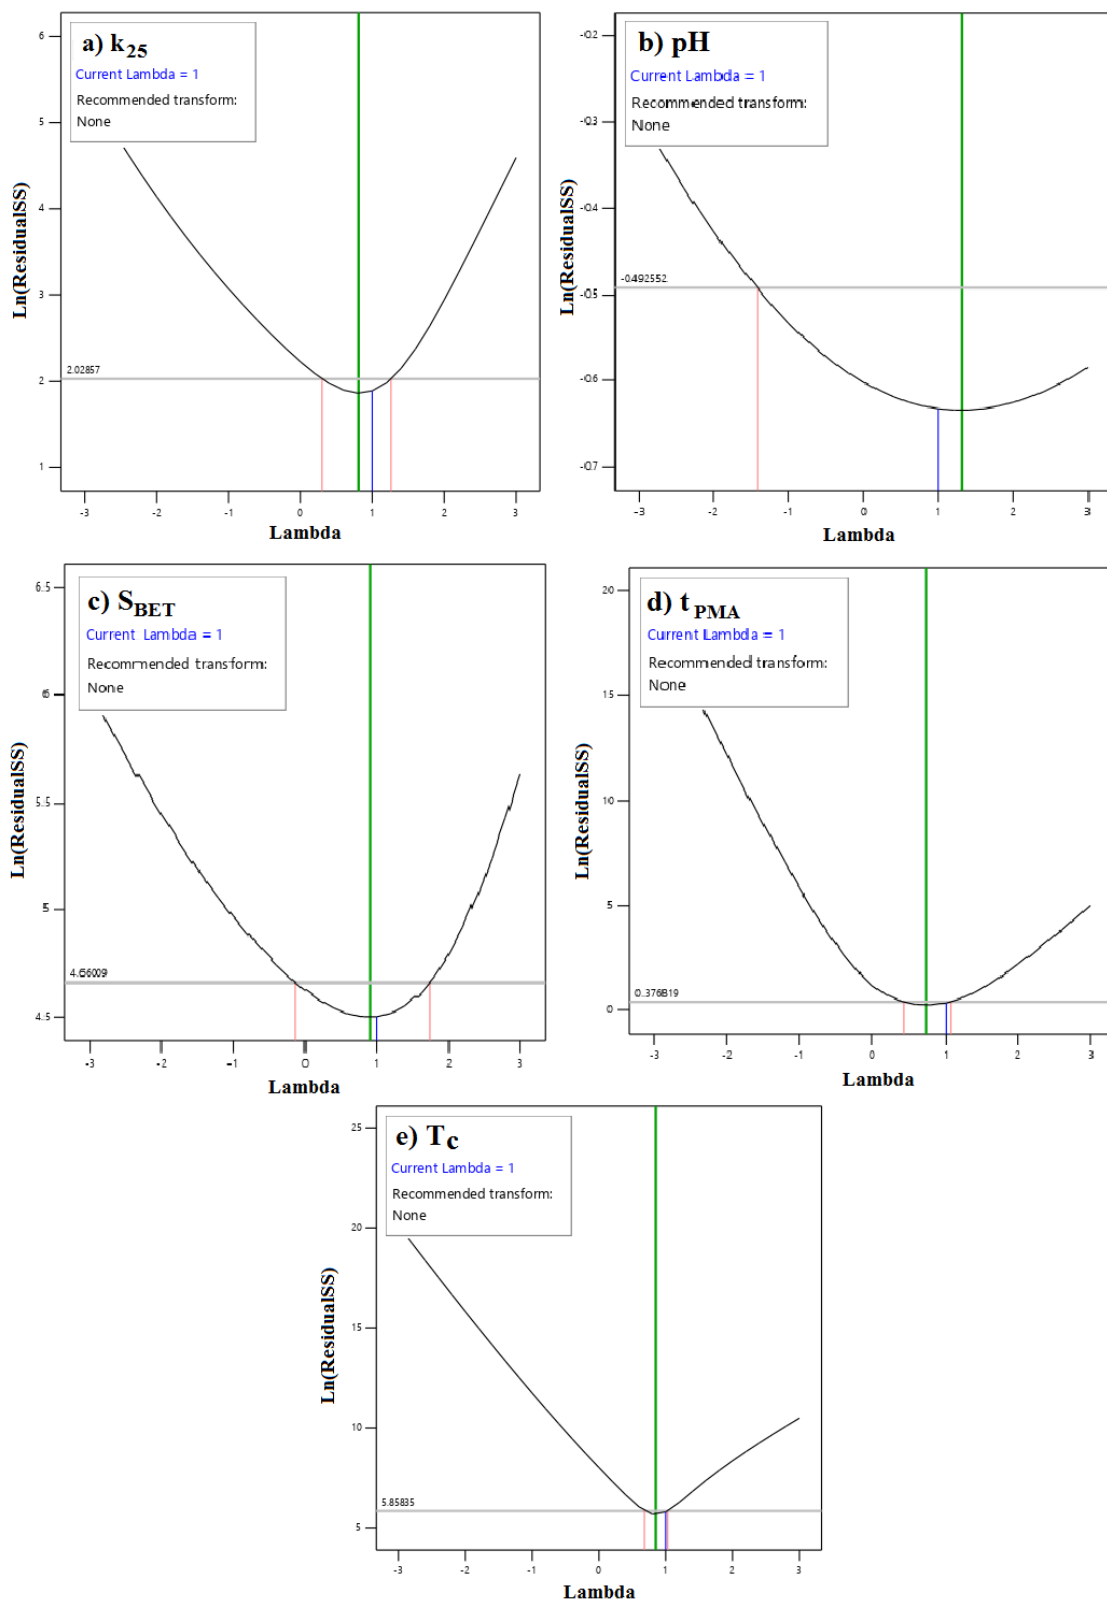

Figure S18. Box-Cox Plot for Power Transforms, a)  $\kappa_{25}$ , b) pH, c)  $S_{BET}$ , d)  $t_{PMA}$ , e)  $T_c$
